# Supplementary material
Source: PubMed Central journal article supplement (PMC6127383)
Supplement: rsta20170080supp1.pdf [file rsta20170080supp1.pdf]

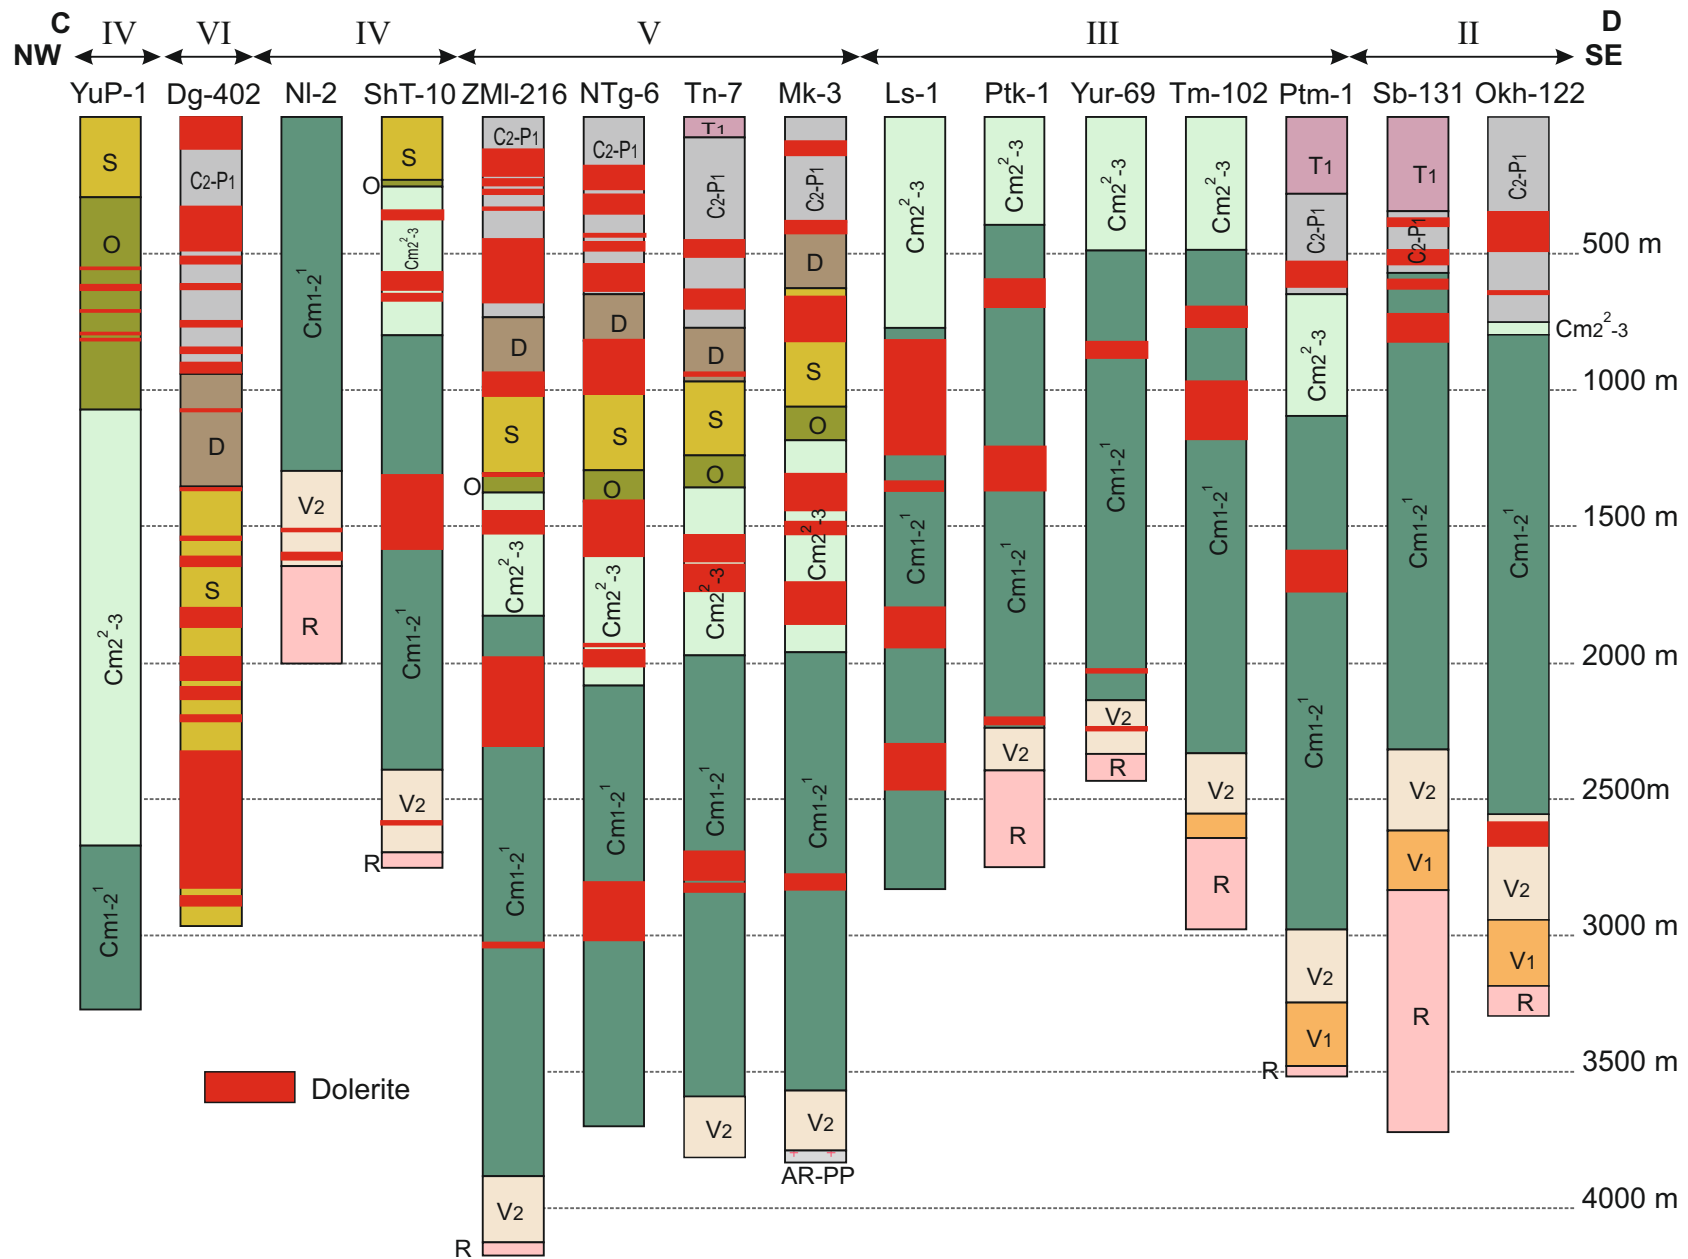

**Figure S1.** Additional logs from East Siberia. Svensen HH, Frolov S, Akhmanov GG, Polozov AG, Jerram DA, Shiganova O, Melnikov N, Iyer K, Planke S. 2018. Sills and gas generation in the Siberian Traps. *Phil. Trans. R. Soc. A* 20170080. <http://dx.doi.org/10.1098/rsta.2017.0080>
