# Supplementary material
Source: PubMed Central journal article supplement (PMC6127383)
Supplement: rsta20170080supp2.pdf [file rsta20170080supp2.pdf]

| Borehole 275 |           | Borehole 219 |           |
|--------------|-----------|--------------|-----------|
| Depth (m)    | TOC (wt%) | Depth (m)    | TOC (wt%) |
| 2046,8       | 0,05      | 2247,5       | 0,01      |
| 2059,7       | 0,08      | 2248,8       | 0,08      |
| 2060,1       | 0,13      | 2258,2       | 0,03      |
| 2207,1       | 0,09      | 2262,2       | 0,03      |
| 2217,4       | 0,08      | 2314,9       | 0,05      |
| 2222,6       | 0,02      | 2315,9       | 4,77      |
| 2225,1       | 0,06      | 2316,4       | 5,43      |
| 2239,7       | 0,21      | 2317,0       | 3,63      |
| 2244,8       | 0,11      | 2317,5       | 3,08      |
| 2580,7       | 0,67      | 2318,5       | 2,72      |
| 2592,5       | 0,44      | 2318,9       | 3,86      |
| 2597,0       | 0,07      | 2320,9       | 10,03     |
| 2603,6       | 0,06      | 2328,1       | 0,02      |
| 2608,5       | 0,21      | 2553,9       | 0,03      |
| 2614,5       | 0,00      | 2558,3       | 0,03      |
| 2622,6       | 0,09      | 2725,6       | 0,04      |
| 2625,5       | 0,04      | 3283,2       | 0,09      |
| 2630,6       | 0,02      | 3288,5       | 0,11      |
| 2793,7       | 0,05      | 3296,1       | 0,11      |
| 2803,6       | 0,06      | 3302,7       | 0,01      |
|              |           | 3307,1       | 0,06      |
|              |           | 3310,7       | 0,11      |
|              |           | 3313,8       | 0,07      |
|              |           | 3317,2       | 0,08      |
|              |           | 3324,4       | 0,03      |
|              |           | 3328,6       | 0,01      |
|              |           | 3333,0       | 0,07      |
|              |           | 3336,0       | 0,01      |
|              |           | 3339,1       | 0,11      |
|              |           | 3344,2       | 0,06      |
|              |           | 3344,3       | 0,06      |
|              |           | 3347,3       | 0,07      |
|              |           | 3350,6       | 0,16      |
|              |           | 3356,8       | 0,02      |
|              |           | 3359,2       | 0,02      |
|              |           | 3367,1       | 0,03      |
|              |           | 3368,4       | 0,01      |
|              |           | 3372,8       | 0,09      |
|              |           | 3455,4       | 0,20      |
|              |           | 3461,7       | 0,02      |
|              |           | 3488,0       | 0,08      |
|              |           | 3516,3       | 0,30      |
|              |           | 3516,6       | 0,03      |
|              |           | 3770,6       | 0,06      |
|              |           | 3780,0       | 0,01      |
|              |           | 3992,3       | 0,01      |
|              |           | 3994,9       | 0,01      |
|              |           | 3997,9       | 0,01      |

**Table S1.** Svensen HH, Frolov S, Akhmanov GG, Polozov AG, Jerram DA, Shiganova O, Melnikov N, Iyer K, Planke S. 2018. Sills and gas generation in the Siberian Traps. *Phil. Trans. R. Soc. A* 20170080. <http://dx.doi.org/10.1098/rsta.2017.0080>.
